# Supplementary material for: FACT Sets a Barrier for Cell Fate Reprogramming in Caenorhabditis elegans and Human Cells
Source: PubMed Central journal article supplement — Dev Cell. 2018 Sep 10;46(5):611–626.e12. doi: 10.1016/j.devcel.2018.07.006 (PMC6137076; doi:10.1016/j.devcel.2018.07.006), 2018-09-10
Supplement: mmc1.pdf [file mmc1.pdf]

**Developmental Cell, Volume 46**

**Supplemental Information**

**FACT Sets a Barrier for Cell Fate Reprogramming**

**in *Caenorhabditis elegans* and Human Cells**

**Ena Kolundzic, Andreas Ofenbauer, Selman I. Bulut, Bora Uyar, Gülkiz Baytek, Anne Sommermeier, Stefanie Seelk, Mei He, Antje Hirsekorn, Dubravka Vucicevic, Altuna Akalin, Sebastian Diecke, Scott A. Lacadie, and Baris Tursun**

## **Supplemental Items**

Supplemental Figures S1 – S6 and figure legends

Supplemental Tables S6 – S8 and description of all tables

Supplemental Tables S1 - S5 can be downloaded as Excel files

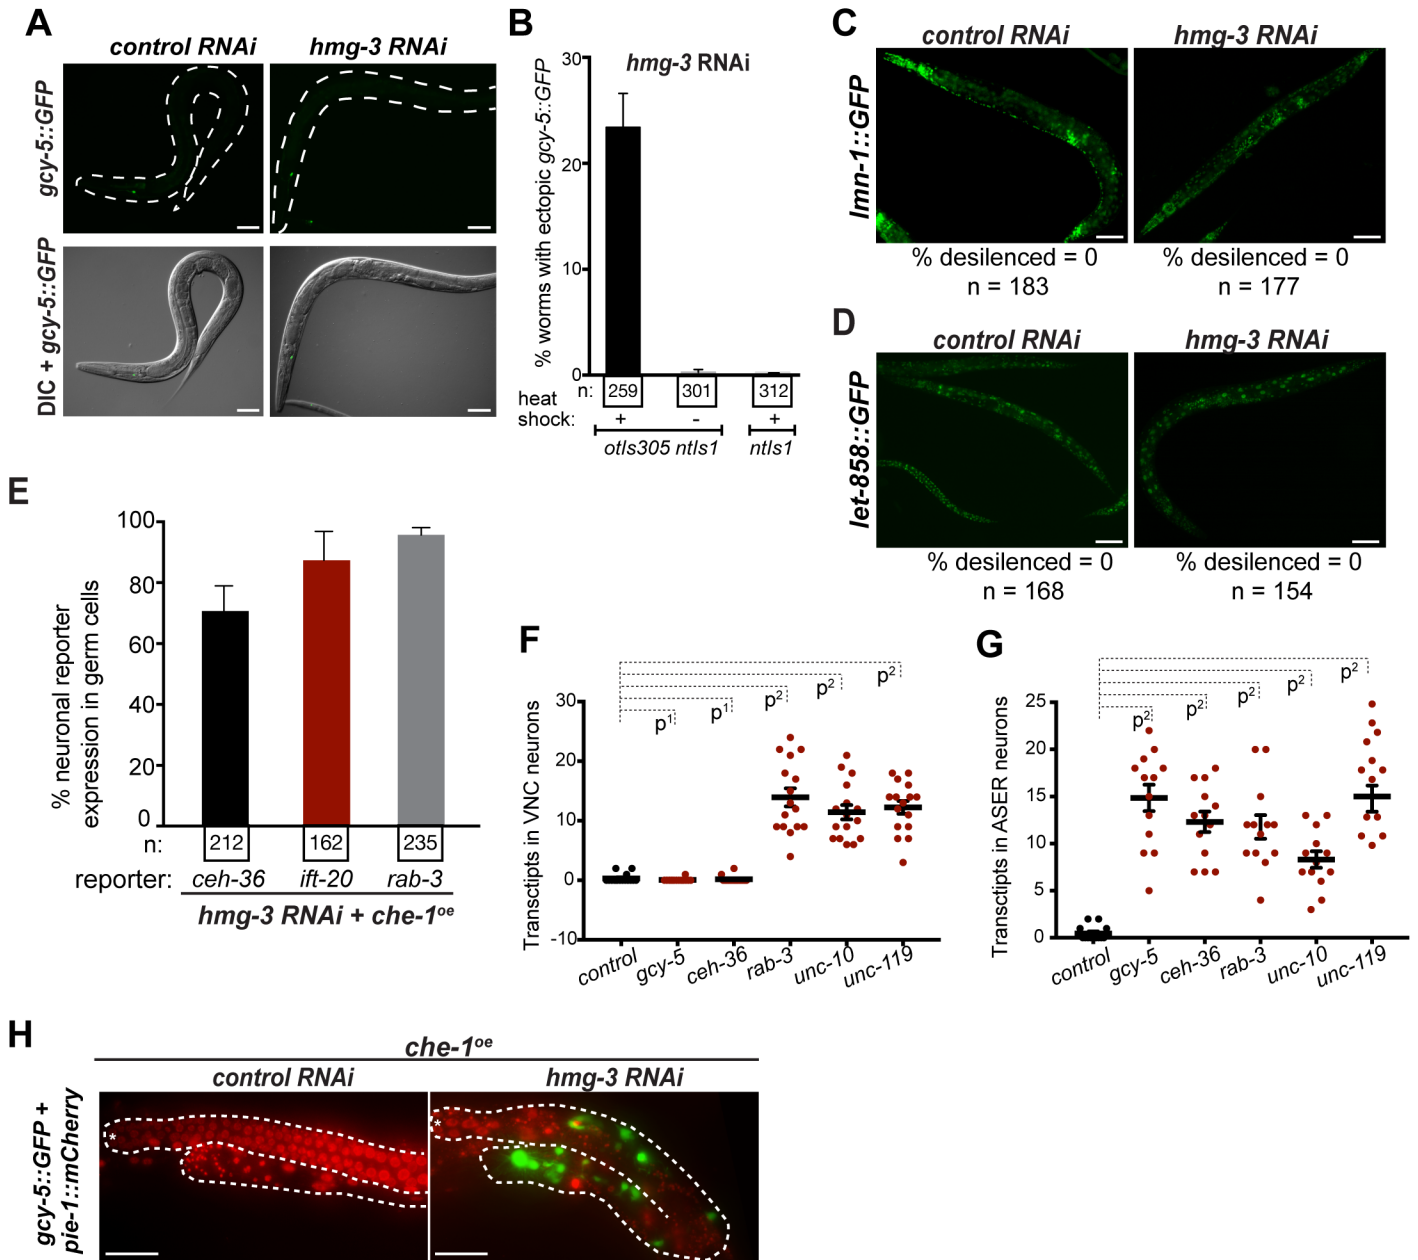

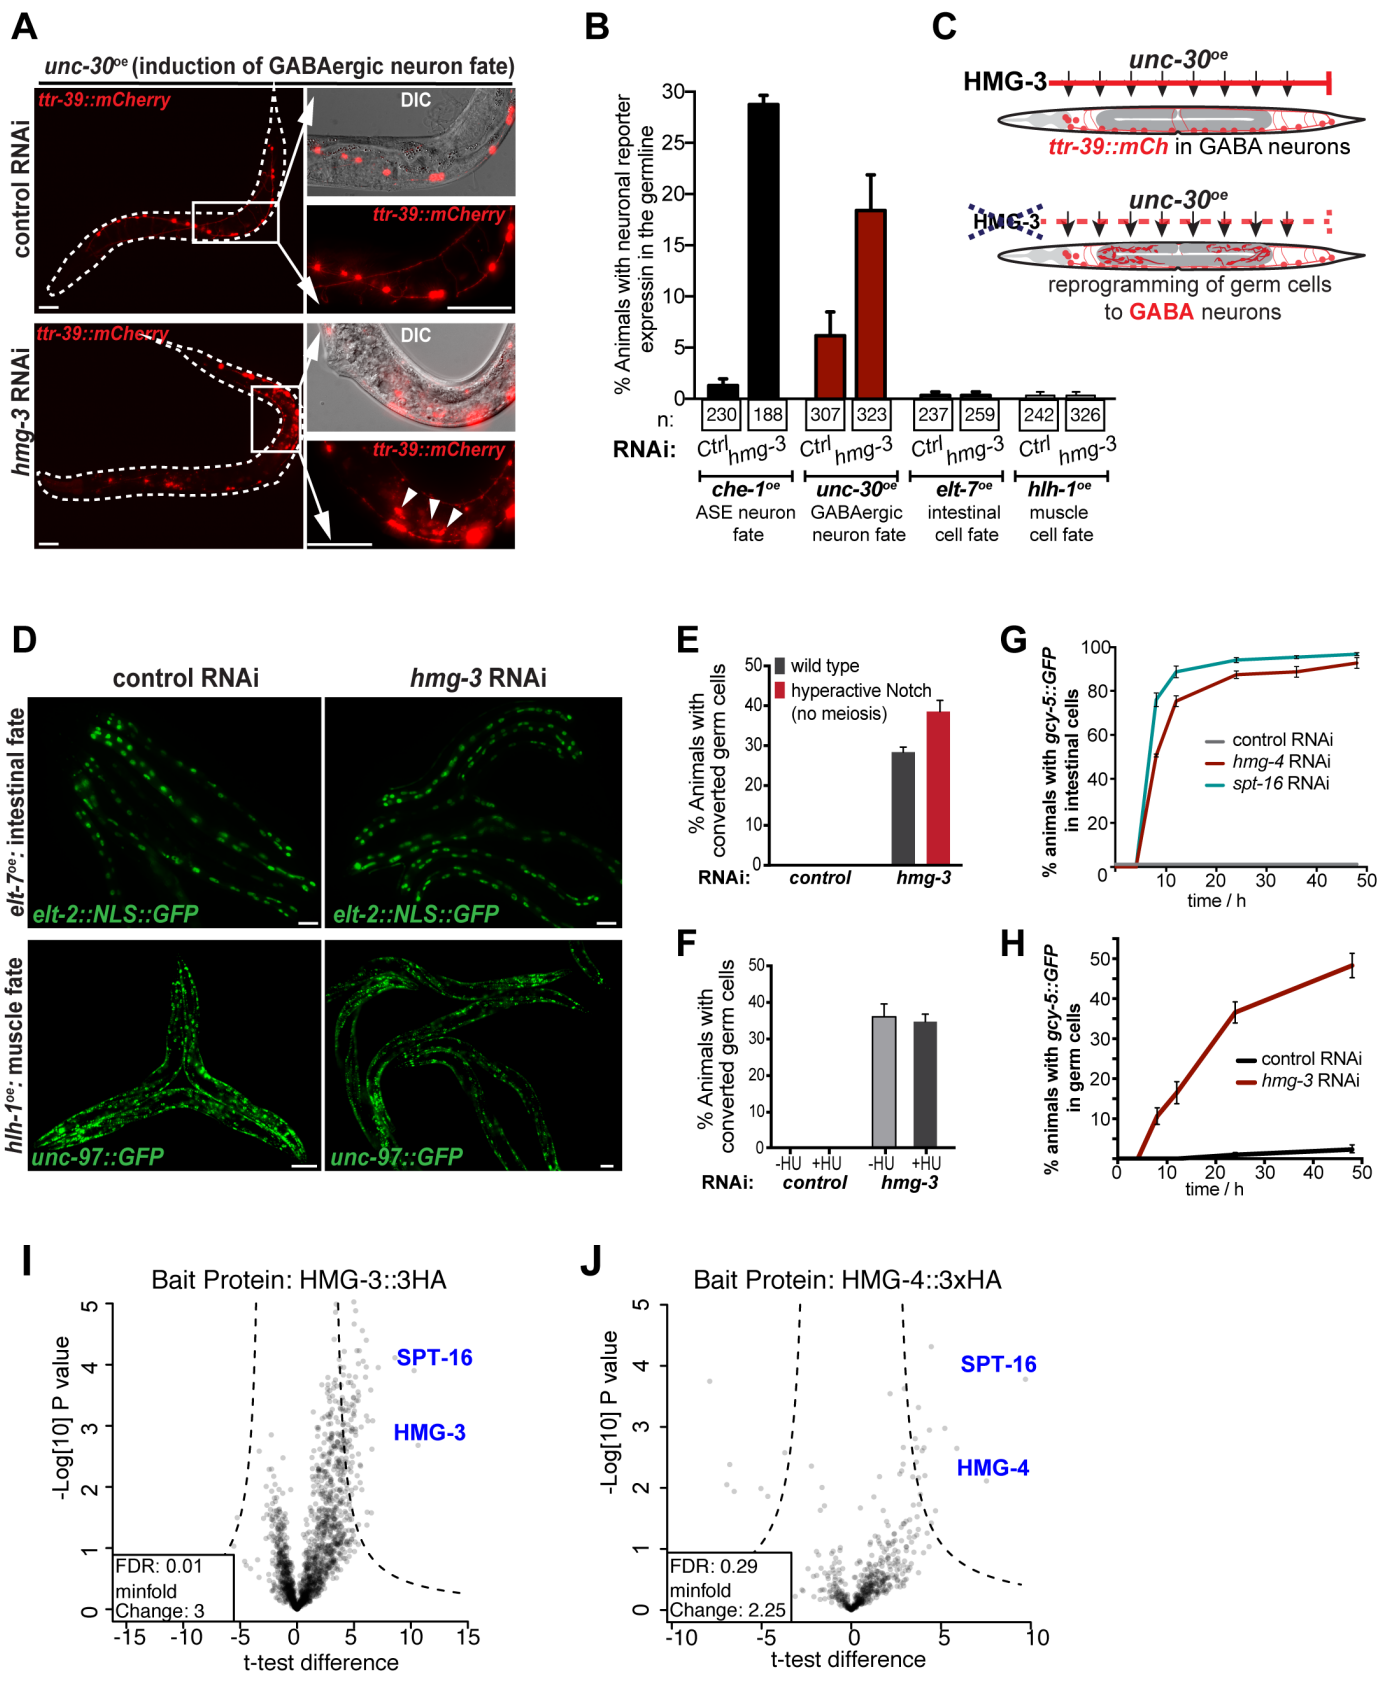

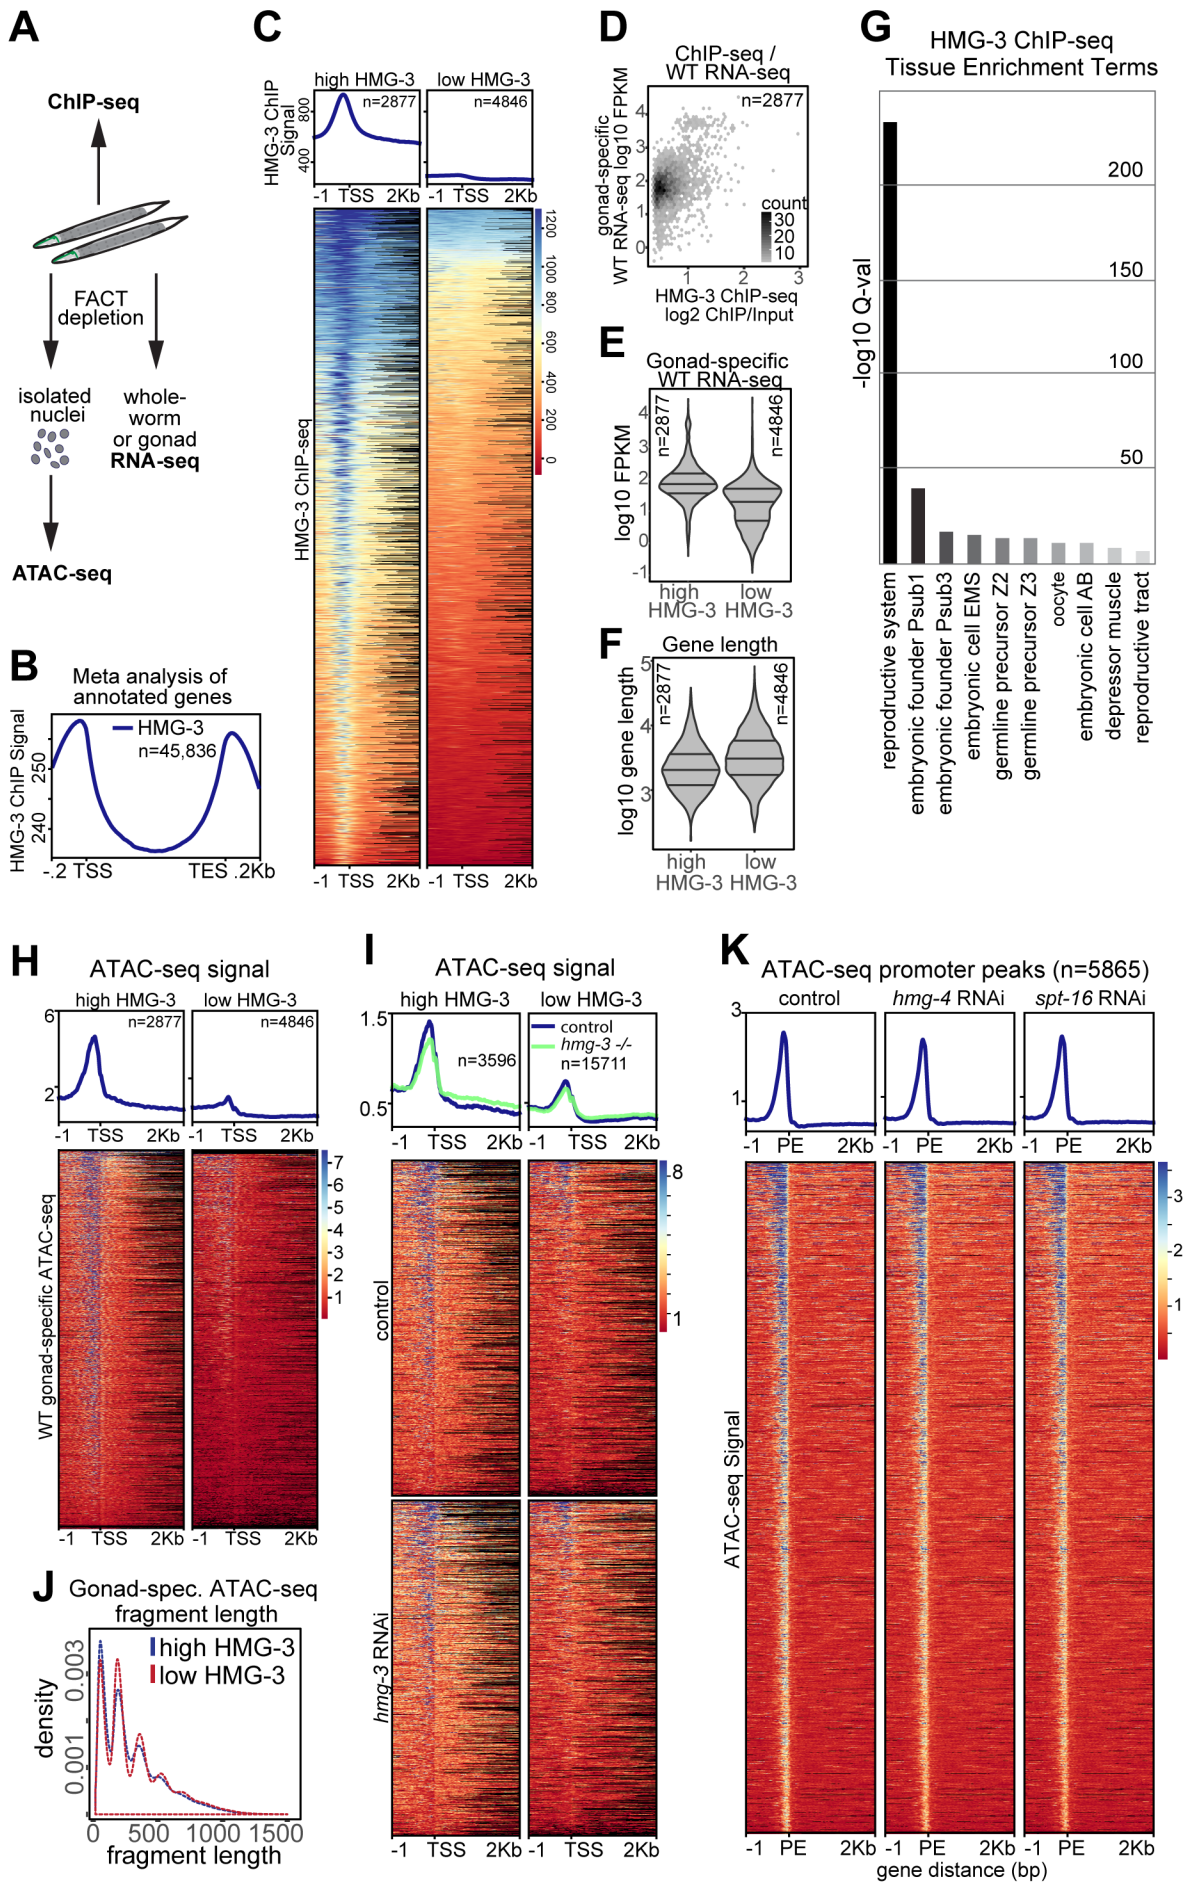

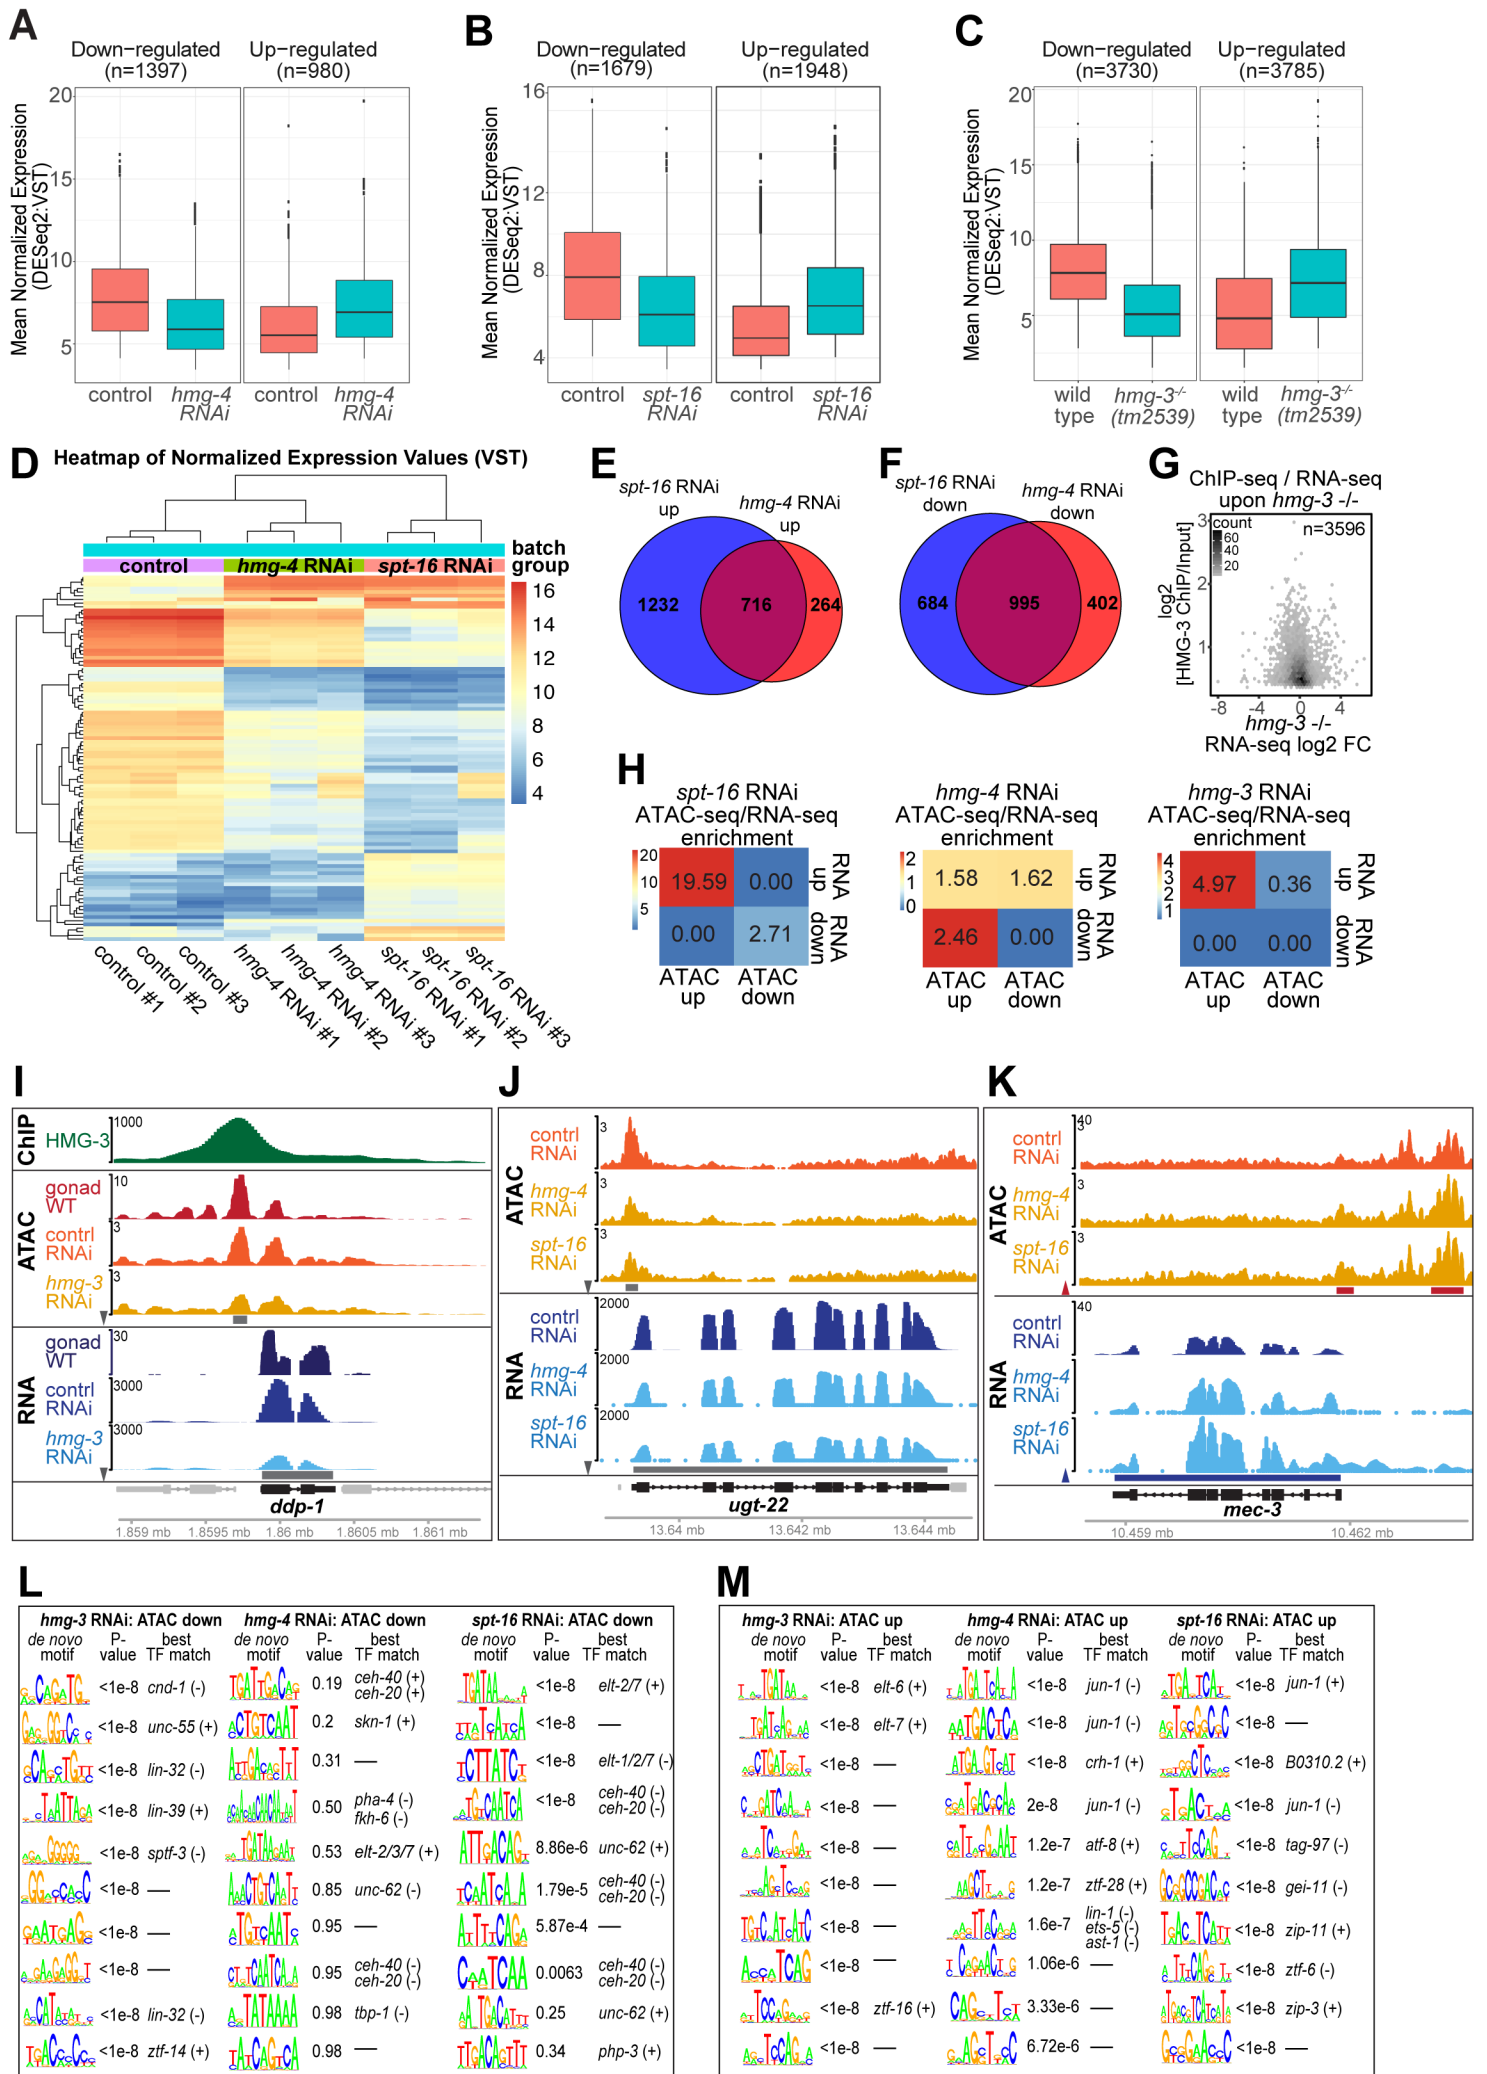

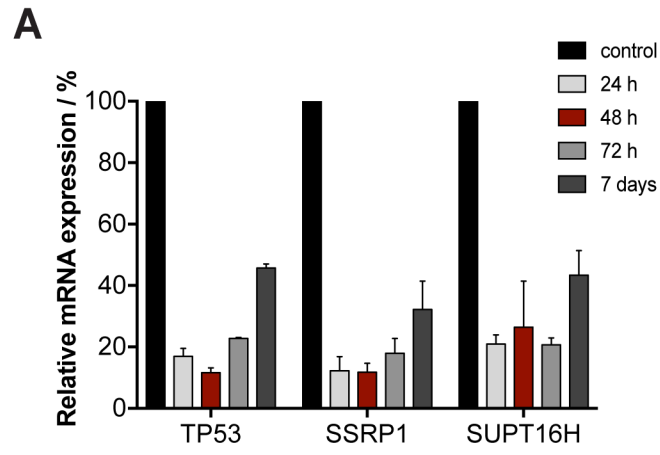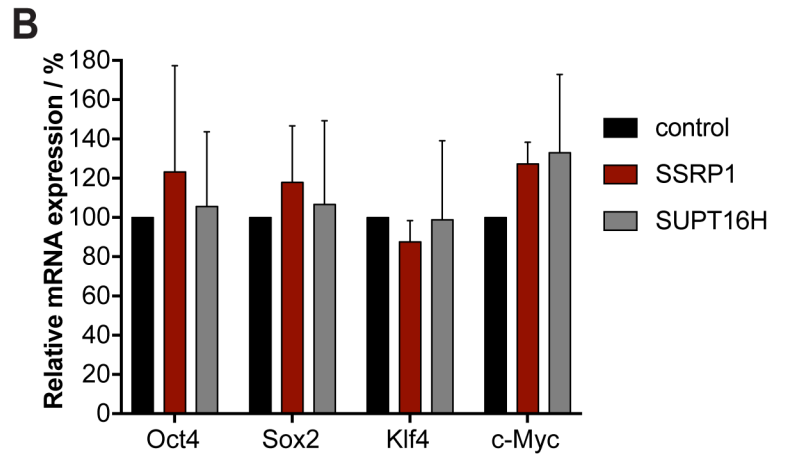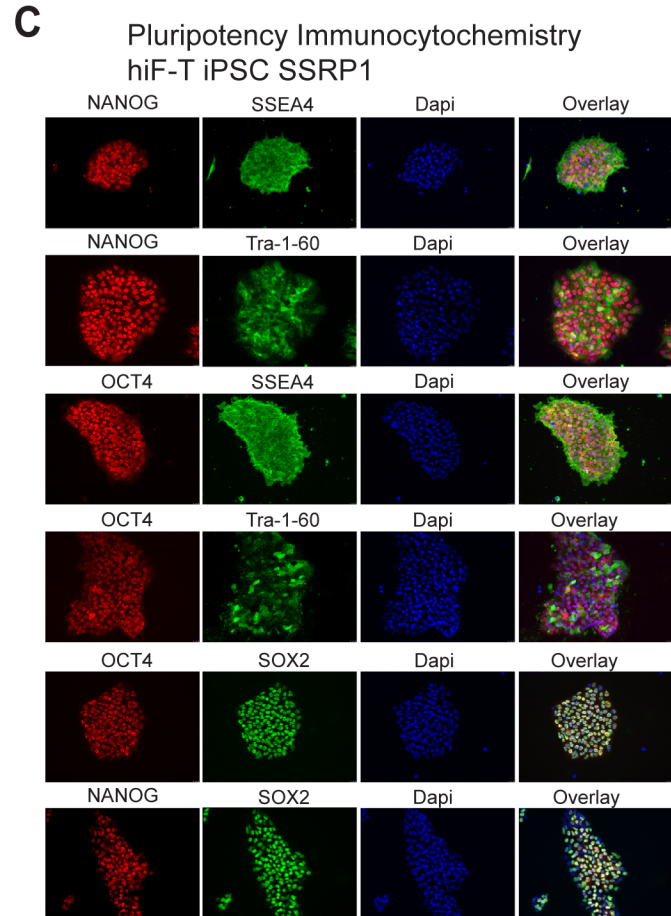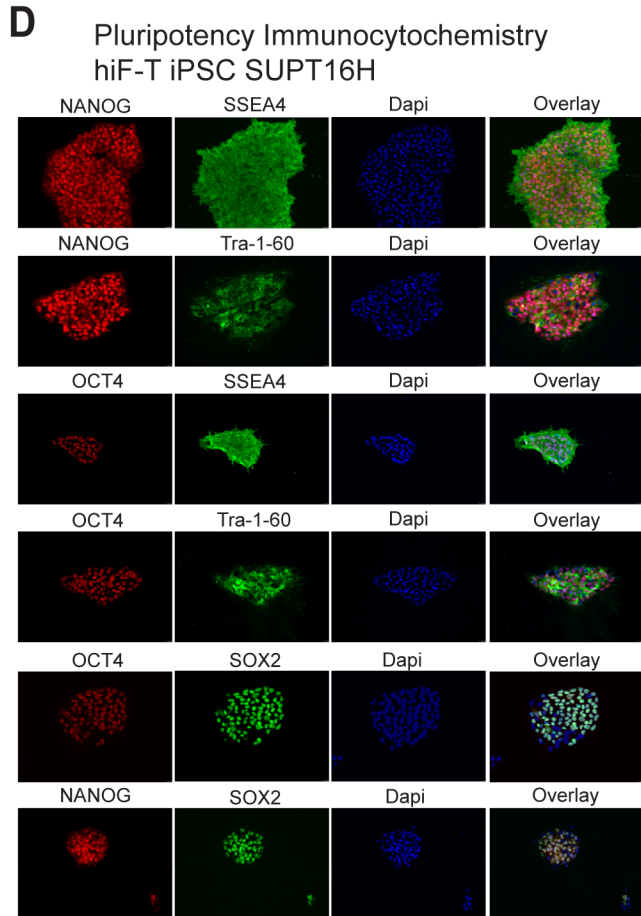

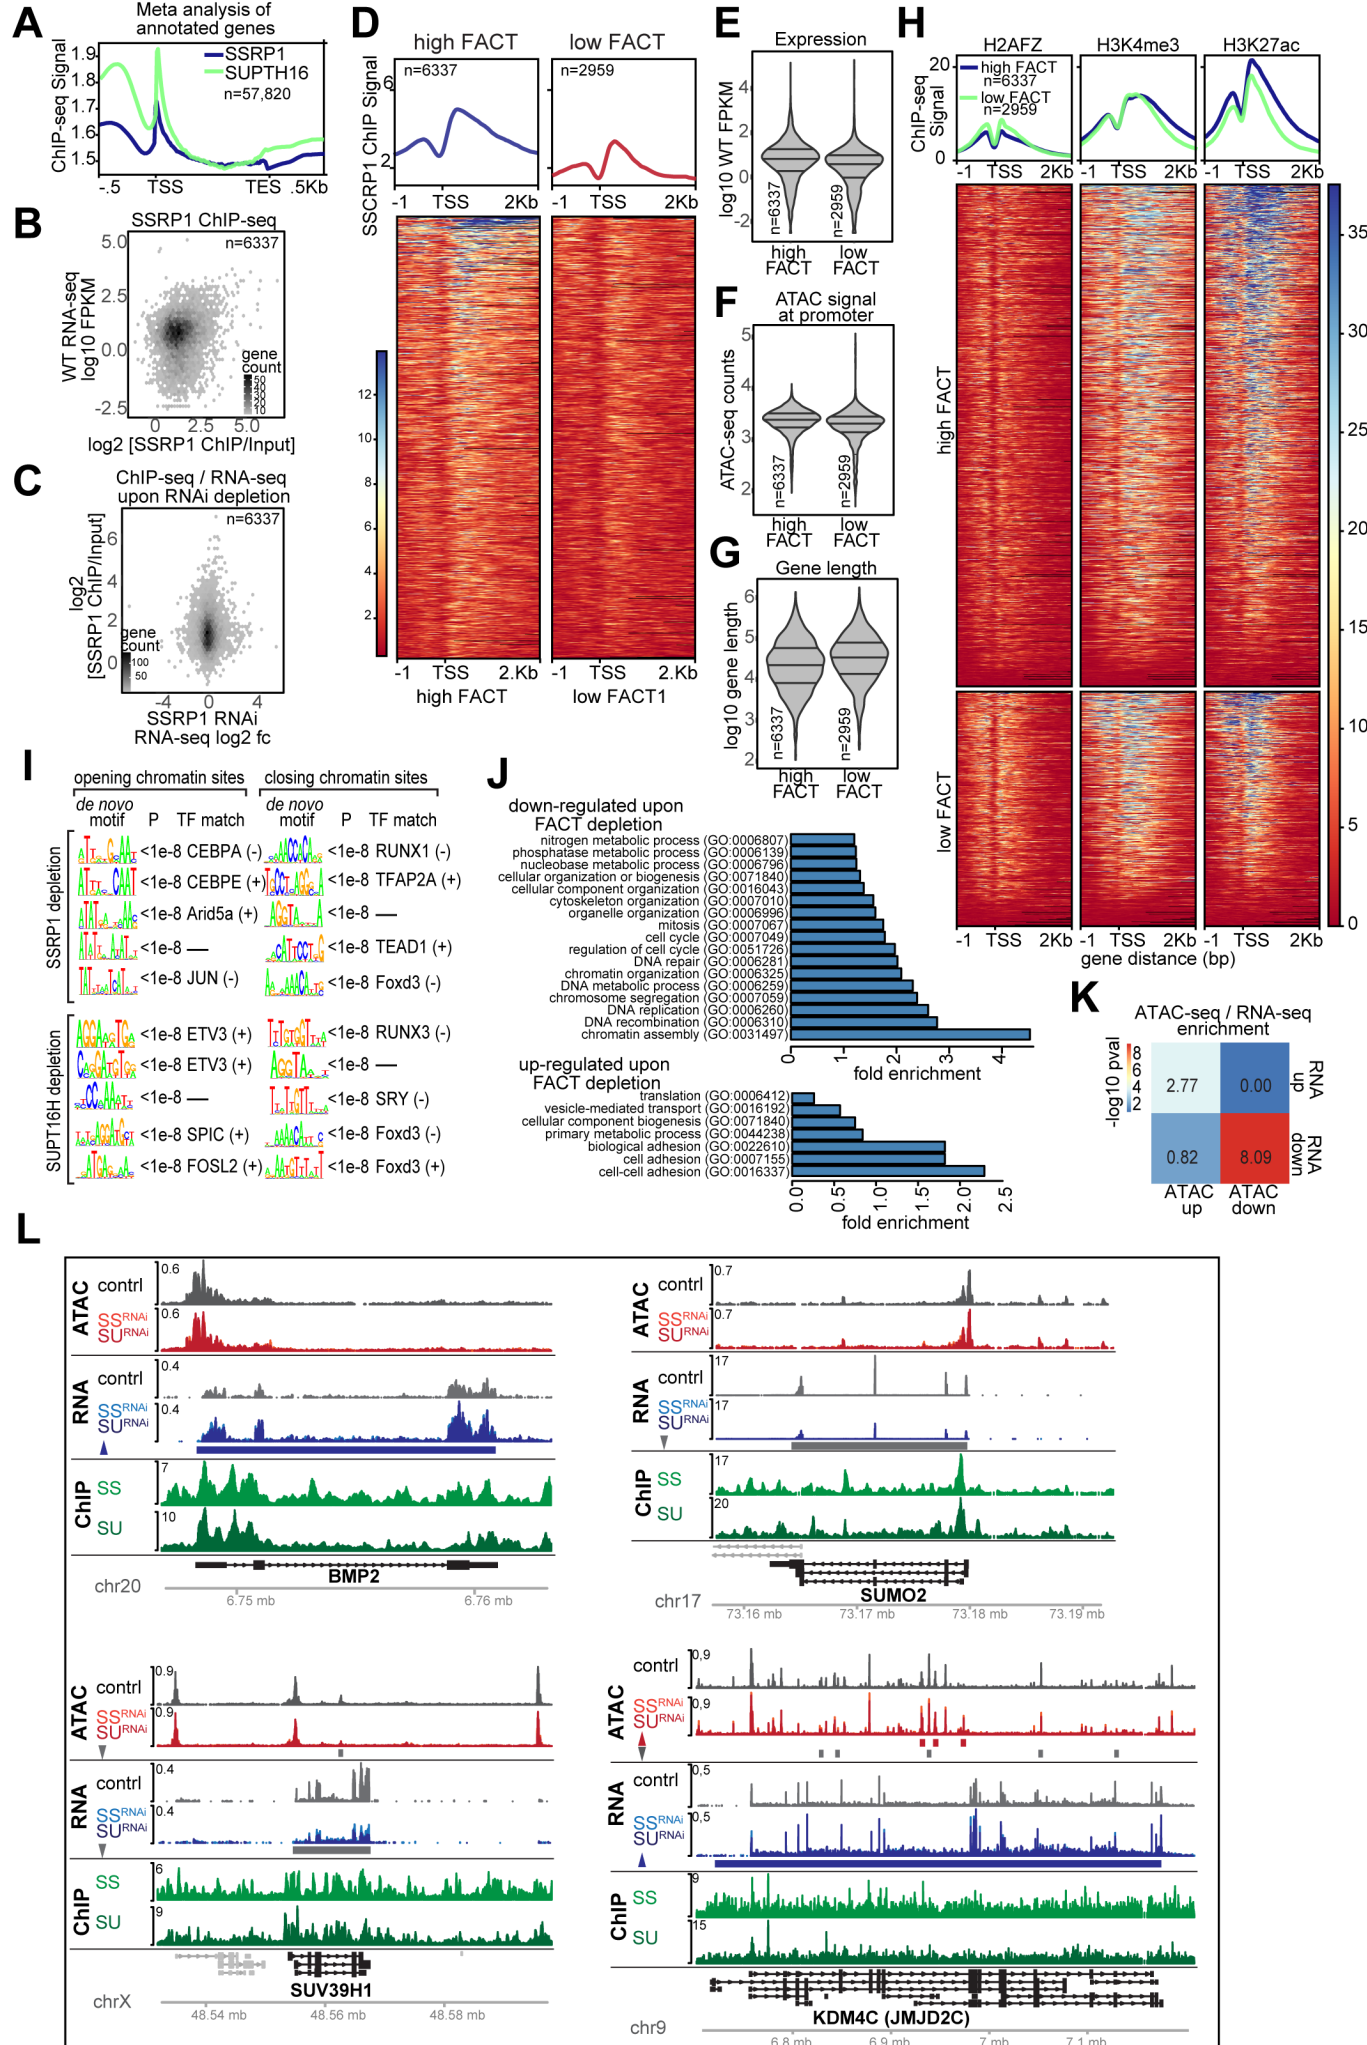



## Supplemental Figure Legends:

### Figure S1. Assessment of Ectopic *gcy-5::GFP* Induction in Germ Cells Upon RNAi Against *hmg-3*, Related to Figure 2

(A) Representative images of *hmg-3<sup>RNAi</sup>* animals with and without *che-1<sup>oe</sup>* (no *hs::che-1* construct in the background), or with only *gcy-5::GFP (ntIs1)* construct in the background. *gcy-5::GFP* is not induced upon *hmg-3* RNAi without *che-1<sup>oe</sup>*. Scale bars, 20  $\mu$ m.

(B) Quantification of *gcy-5::GFP* induction in *hmg-3<sup>RNAi</sup>* with and without *che-1<sup>oe</sup>* (no *hs::che-1* construct in the background) or with only *gcy-5::GFP (ntIs1)* construct in the background. Error bars represent SEM.

(C and D) Representative images of (D) *lmn-1::GFP* and (E) *let-858::GFP* animals after *hmg-3* RNAi. Neither expression of *lmn-1::GFP* nor expression of *let-858::GFP* changes upon FACT depletion. Scale bars, 20  $\mu$ m.

(E) Quantification of neuronal markers *ceh-36::RFP*, *ift-20::NLS::RFP* and *rab-3::NLS::RFP* in *gcy-5::GFP* positive germline of *hmg-3<sup>RNAi</sup>* animals. Error bars represent SEM.

(F and G) Control quantification of smFISH based on counts of hybridization signals (red dots) in (F) ventral nerve cord (VNC) and (G) ASER neurons. For each condition, more than 15 cells were counted for smFISH-derived transcript detection based on fluorescence signals. Ordinary one-way ANOVA was used for statistical analysis.  $p^1$  not significant,  $p^2 < 0.0001$ .

(H) The germ cell fate marker *pie-1::mCherry::his-58* is lost in reprogrammed germ cells. Dashed lines indicated the outline of the gonad, Asterisk labels distal tip of the germline. Scale bars, 5 mm.

### Figure S2. Depletion of HMG-3 Allows Germ Cell Reprogramming to GABA Neuron-Fate and Mass Spectrometry Analysis of HMG-3 / HMG4 Immunoprecipitations, Related to Figures 2 and 3

(A) Representative images for induction of the GABA fate reporter *ttr-39::mCherry* in the germ line of *hmg-3<sup>RNAi</sup>* animals upon overexpression of GABA neuron-fate inducing TF UNC-30 (*unc-30<sup>oe</sup>*). Dashed lines indicated the outline of the worm, boxes indicate the magnification area and arrows in the zoom indicate reprogrammed germ cells. Scale bars, 20 mm, and 5 mM in magnifications.

(B) Quantification of germ cell conversion upon induction of different fate-inducing TFs. Neuronal fate induction can be detected in 20-30% animals after *che-1<sup>oe</sup>* (ASE neuron) or *unc-30<sup>oe</sup>* (GABA neuron), but no intestinal or muscle fate induction by over-expressed ELT-7 (*elt-7<sup>oe</sup>*) or HLH-1 (*hlh-1<sup>oe</sup>*), respectively. Number of animals counted for each condition are indicated as n. Error bars represent SEM.

(C) Schematic representation of transgenic animals for GABA neuron fate induced by *unc-30<sup>oe</sup>*. *unc-30<sup>oe</sup>* in adults after *hmg-3* RNAi induces reprogramming of germ cell to GABA neurons.

(D) Representative pictures showing that overexpression of intestinal (ELT-7) or muscle (HLH-1) fate-inducing TFs do not convert germ cells into gut or muscle cells in *hmg-3<sup>RNAi</sup>* animals. Scale bars, 20  $\mu\text{m}$ .

(E) Germ cell conversion is not lost in the *glp-1(gf)* mutant background (hyperactive Notch) which lacks meiotic germ cells, but retains mitotic germ cells. More than 150 animals were counted for each condition. Error bars represent SEM.

(F) Reprogramming is independent of cell cycle. Phenotype penetrance remained unchanged after HU-mediated cell cycle arrest (-HU, no treatment, +HU, 6 hr HU treatment). More than 150 animals were counted. Error bars represent SEM.

(G) Time course experiment *gcy-5::GFP* induction in *hmg-4<sup>RNAi</sup>* and *spt-16<sup>RNAi</sup>* animals. Time in h after induction of *che-1<sup>oe</sup>*. More than 150 animals were counted for each time point. Error bars represent SEM.

(H) Time course experiment of *gcy-5::GFP* induction in *hmg-3<sup>RNAi</sup>* animals. Time in h after induction of *che-1<sup>oe</sup>*. More than 150 animals were counted for each time point.

(I and J) In order to assess HMG-3 and HMG-4 protein interactions, coimmunoprecipitations with subsequent mass spectrometry (IP-MS) were performed using protein lysates of HMG-3::HA and HMG-4::HA CRISPR tagged animals. Volcano plots show statistically significant enrichment of co-precipitated proteins by (I) HMG-3::HA IP and (J) HMG-4::HA IP. SPT-16 is the most significant co-precipitated protein for both HMG-3 and HMG-4, indicating that both proteins associate predominantly with SPT-16. All IP-MS measurements and statistical values are provided in Table S2.

**Figure S3. Analysis of HMG-3 ChIP-seq, ATAC-seq, and RNA-seq, Related to Figure 4.**

(A) Schematic illustration of ChIP-seq, RNA-seq, and ATAC-seq using isolated nuclei of animals treated with RNAi against FACT subunits without induction.

(B) Meta-analysis of library-normalized, input-subtracted HMG-3 ChIP-seq signal at annotated genes where gene bodies have been scaled to a relative length.

(C) Average positional profiles and heat maps of HMG-3 ChIP-seq signal for gene TSS windows classified as HMG-3 high or HMG-3 low (see Methods) and detected in isolated gonad RNA-seq. Signal is library normalized and input subtracted (see Methods).

(D) Log<sub>2</sub> ratio of HMG-3 ChIP/Input plotted against FPKM expression values from isolated gonad RNA-seq for genes classified as HMG-3 high. Density scatter plot scale shows number of genes plotted per hexbin.

(E) Distribution violin plots of detected gene FPKM values from isolated gonad RNA-seq for genes with high or low HMG-3.

(F) Log<sub>10</sub> gene length for genes determined as HMG-3 high or HMG-3 low and detected in gonad-isolated RNA-seq.

(G) Tissue enrichment analysis of genes identified as HMG-3 ChIP-seq positive using wormbase.org provided analysis (Angeles-Albores et al., 2016).

(H and I) Average positional profiles and heat maps for library-normalized ATAC-seq signal from (H) isolated gonads and (I) whole worms following FACT knockdown for genes classified as HMG-3 high or HMG-3 low and detected in RNA-seq.

(J) Density distributions of isolated gonad ATAC-seq fragment lengths intersecting TSS windows for genes classified as HMG-3 high or HMG-3 low and detected in RNA-seq.

(K) Average positional profiles and heat maps of library-normalized whole worm ATAC-seq signal with and without FACT knockdown. Plots are anchored on downstream edges of promoter-annotating ATAC-seq peaks (see Methods).

**Figure S4. RNA-seq Analysis and *de novo* Motif Generation from Worm ATAC-seq, Related to Figure 4.**

(A, B, and C) Expression changes in *C. elegans* with RNAi against (A) *hmg-4*, (B) *spt-16*, or (C) containing a mutation in *hmg-3*. Up/down regulated genes are detected based on the differential expression criteria of adjusted p-value of at least 0.1 and at least two-fold increase or decrease in expression levels in relation to the control samples. Transcription levels of these up- and down regulated genes are represented as boxplots.

(D) A heatmap of unsupervised hierarchical clustering of the top 100 genes with most variant gene expression across control, *hmg-4* and *spt-16* RNAi samples shows that *hmg-4*<sup>RNAi</sup> and *spt-16*<sup>RNAi</sup> are more similar to each other than the control. Independently generated biological replicates clustered together (individual samples and batches are indicated).

(E and F) Venn-diagram showing overlap of (E) up-regulated and (F) down-regulated genes (numbers given) in *hmg-4*<sup>RNAi</sup> and *spt-16*<sup>RNAi</sup> animals.

(G) Log2 fold-changes in expression levels from whole worm RNA-seq after *hmg-3*<sup>RNAi</sup> plotted against log2 ratio of HMG-3 ChIP/Input for genes classified as HMG-3 high and detected in the RNA-seq. Density scatter plot scale shows number of genes plotted per hexbin.

(H)  $-\text{Log}_{10}$  enrichment p-values of genes assigned only up-regulated or only down-regulated ATAC-seq peaks that intersected genes detected as up- or down-regulated in differential RNA-seq analysis for *spt-16* (left), *hmg-4* (middle), and *hmg-3* (right) depletion experiments.

(I-K) Browser shots of library-normalized, input-subtracted HMG-3 ChIP-seq signal, library-normalized ATAC-seq from isolated gonads, library-normalized ATAC-seq signal from whole worms with and without RNAi against *hmg-3*, *hmg-4*, or *spt-16*, and library-normalized RNA-seq signal with and without RNAi against *hmg-3*, *hmg-4*, or *spt-16*. Genes and ATAC-seq peaks called as differentially regulated upon FACT knockdown are shown below the respective signal tracks.

(L and M) *De novo* motif generation (see Methods) in closing (L) or opening (M) regions upon *hmg-3*<sup>RNAi</sup>, *hmg-4*<sup>RNAi</sup> and *spt-16*<sup>RNAi</sup>. Top 10 enriched motifs for each indicated set together with the p value and the best TF match are given. The orientation of the generated motif relative to the best TF match in the database is indicated in parentheses.

**Figure S5. FACT siRNA Knockdown efficiency and Pluripotency Marker Expression in FACT-Depletion Derived iPSCs, Related to Figure 5**

(A) Quantitative RT-PCR (qRT-PCR) analysis to confirm knock-down of SSRP1, SUPT16H and TP53 at 24 h, 48 h, 72 h and 7 days after transfection with siRNAs.

(B) qRT-PCR analysis for expression of levels of Oct4, Sox2, Klf4, and c-Myc 48 hours after SSRP1 or SUPT16H depletion. Gene expression levels were normalized to GAPDH expression levels and compared to control siRNA. Error bars represent SD.

(C and D) Representative images of antibody staining for NANOG, OCT4, SOX2 SSEA-4 and Tra-1-60 in iPSC colonies derived from SSRP1 (C) or SUPT16H (D) depleted hiF-T cells. Scale bars, 25  $\mu$ m.

**Figure S6. FACT ChIP-seq, RNA-seq, and ATAC-seq Analysis, Related to Figure 6.**

(A) Meta-analysis of library- and input-normalized SSRP1 and SUPT16H ChIP-seq signal at annotated genes. Signal in gene bodies is scaled to relative lengths.

(B) Log<sub>2</sub> ratio of SSRP1 ChIP/Input plotted against FPKM expression values from control RNA-seq for genes classified as FACT high and detected in the RNA-seq. Density scatter plot scale shows number of genes plotted per hexbin.

(C) Log<sub>2</sub> fold-changes in expression levels from RNA-seq after SSRP1 knockdown plotted against log<sub>2</sub> ratio of SSRP1 ChIP/Input for genes classified as FACT high and detected in the RNA-seq. Density scatter plot scale shows number of genes plotted per hexbin.

(D) Average positional profiles and heat maps of library- and input-normalized SSRP1 ChIP-seq signal for genes whose TSS windows classified as FACT high or FACT low (see Methods).

(E-G) Violin distribution plots of wild-type RNA-seq FPKM expression values, E, ATAC-seq counts in promoter windows, F, and log<sub>10</sub> gene lengths, G, for genes classified as FACT high or FACT low and detected in the RNA-seq.

(H) Average positional profiles and heat maps of H2AFZ, H3K4me3, and H3K27ac ChIP-seq signal from ENCODE human lung fibroblasts datasets for genes classified as FACT high or FACT low and detected in the RNA-seq.

(I) *De novo* motif generation results (Methods) in closing and opening regions upon SSRP1<sup>RNAi</sup> and SUPT16H<sup>RNAi</sup>. Top 5 enriched motifs for each indicated set together with the p value and the best TF match are given. The orientation of the generated motif relative to the best TF match in the database is indicated in parentheses.

(J) Observed/Expected Go analysis enrichments using PANTHER on differentially expressed genes called as up-regulated or down-regulated in either SSRP1 or SUPT16H knockdown compared to all genes detected in the RNA-seq analysis.

(K) -Log<sub>10</sub> enrichment pvalues of genes assigned only up-regulated or only down-regulated ATAC-seq peaks following SSRP1 or SUPT16H knockdown that intersect genes called as differentially expressed in RNA-seq after SSRP1 or SUPT16H knockdown.

(L) Browser shots as described in Figure 7M for BMP2, SUMO2, SUV39H1, and KDM4C genes.

**Supplemental Table S6. Summary of FACT depletion effects based on RNA-seq and ATAC-seq in *C. elegans* and Human Cells, Related to Figures 4, S3, S4, 6, and S6**

WORM:

RNA-seq

299/3596 genes bound strongly by hmg-3 ('HMG-3 high genes') are UP in hmg-3 RNAi  
540/3596 genes bound strongly by hmg-3 ('HMG-3 high genes') are DOWN in hmg-3 RNAi  
3593/15711 genes bound moderately by hmg-3 ('HMG-3 low genes') are UP in hmg-3 RNAi  
3136/15711 genes bound moderately by hmg-3 ('HMG-3 low genes') are DOWN in hmg-3 RNAi

ATAC

592/3596 genes bound strongly by hmg-3 ('HMG-3 high') have assigned UP peaks in hmg-3 RNAi  
369/3596 genes bound strongly by hmg-3 ('HMG-3 high') have assigned DOWN peaks in hmg-3 RNAi  
2021/15711 genes bound moderately by hmg-3 ('HMG-3 low') have assigned UP peaks in hmg-3 RNAi  
2006/15711 genes bound moderately by hmg-3 ('HMG-3 low') have assigned DOWN peaks in hmg-3 RNAi

HUMAN:

RNA

758/6337 genes bound strongly by FACT ('FACT high') are UP in either SSRP1 or SUPT16H RNAi  
884/6337 genes bound strongly by FACT ('FACT high') are DOWN in either SSRP1 or SUPT16H RNAi  
453/2959 genes bound moderately by FACT ('low') are DOWN in either SSRP1 or SUPT16H RNAi  
324/2959 genes bound moderately by FACT ('low') are UP in either SSRP1 or SUPT16H RNAi

ATAC

1072/6337 'FACT high' genes have assigned UP peaks in either SSRP1 or SUPT16H RNAi  
1089/6337 FACT high genes have assigned DOWN peaks in either SSRP1 or SUPT16H RNAi  
539/2959 FACT low genes have assigned UP peaks in either SSRP1 or SUPT16H RNAi  
544/2959 FACT low genes have assigned DOWN peaks in either SSRP1 or SUPT16H RNAi

**Table S7. *C. elegans* strains used in the study, Related to STAR Methods**

| Name          | Genotype                                                                                                                                                   |
|---------------|------------------------------------------------------------------------------------------------------------------------------------------------------------|
| BAT012        | <i>barIs12[elt-2prom::gfp; myo-3p::NmBirAo]</i>                                                                                                            |
| BAT026        | <i>otIs284 [hsp-16.48prom::che-1::3XHA::BLRP; rol-6(su1006)]; ntlIs1 [gcy-5::gfp; lin-15b(+)] V.; hdlIs30 [glr-1::dsRED]</i>                               |
| BAT028/OH9846 | <i>otIs305 [hsp-16.48prom::che-1::3XHA::BLRP; rol-6(su1006)]; ntlIs1 [gcy-5::gfp; lin-15b(+)] V.</i>                                                       |
| BAT032        | <i>glp-1(ar202) III.; otIs305 [hsp-16.48prom::che-1::3XHA::BLRP; rol-6(su1006)]; ntlIs1 [gcy-5::gfp; lin-15b(+)] V.</i>                                    |
| BAT044        | <i>julS244 [ttr-39prom::mCherry; ttx-3prom::gfp]; otIs305 [hsp-16.48prom::che-1::3XHA::BLRP; rol-6(su1006)]; ntlIs1 [gcy-5::gfp; lin-15b(+)] V.</i>        |
| BAT046        | <i>otIs133 [ttx-3prom::mCherry]; otIs284 [hsp-16.48prom::che-1::3XHA::BLRP; rol-6(su1006)]; ntlIs1 [gcy-5::gfp; lin-15b(+)] V.; hdlIs30 [glr-1::dsRED]</i> |
| BAT068        | <i>otEX4945 [hs:hlh-1, rol-6(su1006)]; mgIs25 [unc-97prom::gfp]</i>                                                                                        |
| BAT109        | <i>otIs305 [hsp-16.48prom::che-1::3XHA::BLRP; rol-6(su1006)] V.</i>                                                                                        |
| BAT139        | <i>stIs10086 [ges-1::H1-Wcherry + unc-119(+)]</i>                                                                                                          |
| BAT160        | <i>itIs37 [pie-1p::mCherry::his-58(pAA64), unc-119(+)]; otIs305 [hsp-16.48prom::che-1::3XHA::BLRP; rol-6(su1006)] ntlIs1 [gcy-5p::GFP, lin-15(+)] V.</i>   |
| BAT282        | <i>barIs40 [vit-5::2xNLS::TagRFP]</i>                                                                                                                      |
| BAT284        | <i>stIs10131 [elt-7::H1-wCherry + unc-119(+)]</i>                                                                                                          |
| BAT287        | <i>ntlIs1 [gcy-5::gfp; lin-15b(+)] V.</i>                                                                                                                  |
| BAT326        | <i>otIs263 [ceh-36prom::tagRFP]; otIs305 [hsp-16.48prom::che-1::3XHA::BLRP; rol-6(su1006)]; ntlIs1 [gcy-5::gfp; lin-15b(+)] V.</i>                         |
| BAT453        | <i>barEx147 [hsp-16.4prom::unc-30; hsp-16.2prom::unc-30; rol-6(su1006)]; julS244 [ttr-39prom::mCherry; ttx-3prom::gfp]</i>                                 |
| BAT522        | <i>otIs393 [ift-20prom::NLS::tagRFP]; otIs305 [hsp-16.48prom::che-1::3XHA::BLRP; rol-6(su1006)]; ntlIs1 [gcy-5::gfp; lin-15b(+)] V.</i>                    |
| BAT525        | <i>hmg-3 (tm2539) / dpy-5(e61) unc-13(e1091) I.</i>                                                                                                        |
| BAT527        | <i>otIs355 [rab-3prom::NLS::TagRFP]; otIs305 [hsp-16.48prom::che-1::3XHA::BLRP; rol-6(su1006)]; ntlIs1 [gcy-5::gfp; lin-15b(+)] V.</i>                     |
| BAT606        | <i>edIs6 [unc-119::gfp + pRF4[rol-6(su1006)] IV.]; otIs305 [hsp-16.48prom::che-1::3XHA::BLRP; rol-6(su1006)] V.</i>                                        |
| BAT1560       | <i>hmg-3(bar24[hmg-3::3xHA]) I. protein tag CRISPR engineered</i>                                                                                          |
| BAT1753       | <i>hmg-3(bar24[hmg-3::3xHA]) I. 2x outcrossed</i>                                                                                                          |
| BAT1945       | <i>jun-1(gk557) II; otIs305[hsp::che-1::3xHA, rol-6] ntlIs1[gcy-5::GFP]</i>                                                                                |
| BAT1967       | <i>hmg-4(bar32[hmg-4::3xHA]) III</i>                                                                                                                       |
| JR3373        | <i>wIs125[hsp-16-2::elt-7 hsp-16-41::elt-7]; rrls1 [elt-2::GFP + unc-119(+)]</i>                                                                           |
| LW697         | <i>ccls4810/pJKL380.4; lmn-1p::lmn-1::GFP::lmn-1 3'utr + pMH86; dpy-20(+)] I.</i>                                                                          |
| NL2507        | <i>pkIs1582[let-858::GFP + rol-6(su1006)]</i>                                                                                                              |
| SS104         | <i>glp-4(bn2) I.</i>                                                                                                                                       |
| OD56          | <i>itIs 37[pie-1p::mCherry::his-58 unc-119(+)];unc-119(ed3) III.</i>                                                                                       |

Supplemental Table S8. Sequences of smFISH Oligos, PCR primers, and siRNAs, Related to Star Methods

| 7A. smFISH probes    |                       |               |
|----------------------|-----------------------|---------------|
| Probe set            | Sequences             | Fluorophore   |
| <i>gcy-5_set1</i>    | cattcggatgctccaagaac  | Fluor Red 610 |
|                      | caattccaactcgaagcgtc  |               |
|                      | caattggaagagttccacca  |               |
|                      | tatcgcattcggatattcc   |               |
|                      | lcccaactacaacatctacat |               |
|                      | tattggatcagccaactgg   |               |
|                      | lgccaactcgaataaattgga |               |
|                      | tttacagtagcttggctgt   |               |
|                      | cttaaggttgctcaacatc   |               |
|                      | atccgcaactggatagatc   |               |
|                      | cgatctgttaatgectcat   |               |
|                      | tacgagctcgaactttaca   |               |
|                      | ggaccactaattgccaata   |               |
|                      | ccaatactcctcattgcaa   |               |
|                      | tcttccaactgtttgt      |               |
|                      | lggagttagtcatttgcaa   |               |
|                      | ctactgtgaatgactccaa   |               |
|                      | atttctaagcagctccgaa   |               |
|                      | lgccatccgataaagttaa   |               |
|                      | lagaatacatttggcgcata  |               |
|                      | gcggtagagatttgaccaa   |               |
|                      | lcatgttaactagtccact   |               |
|                      | ccgtgacaattgcaagacg   |               |
|                      | cgtttttttttggcat      |               |
|                      | gtgactctcgaactttggc   |               |
|                      | actttccggttatagttg    |               |
|                      | gctatgattgttgggtta    |               |
|                      | atttctctctctcttta     |               |
|                      | ggatccatcagatagatacc  |               |
|                      | gatactcgaatgatctcc    |               |
|                      | aaagtccaactcctcga     |               |
|                      | ggcaagtagctgaactaga   |               |
|                      | ctccaatccaaactctgt    |               |
|                      | tacgatttctctttttc     |               |
|                      | aagttaactccggctcga    |               |
|                      | acttgcataatttctcagct  |               |
|                      | gttctgcaactgttttga    |               |
|                      | tctccaattgattccactt   |               |
|                      | lgtcggtaaccagaaacac   |               |
|                      | ggaaccttgaaactcttaca  |               |
|                      | gcccactattaattccaatt  |               |
|                      | atggatagccaacgacacc   |               |
|                      | gtatcccaaataggcaata   |               |
|                      | ttccaatttccactct      |               |
|                      | lgtgcagctctgacatag    |               |
|                      | tctctcttgaactgtttc    |               |
|                      | lgtttccatfacactttc    |               |
|                      | gatttggctcactgctcgt   |               |
|                      | gtgtagaatttgggtgctcat |               |
|                      | ggataagcngttagccgng   |               |
| lccggcagcaaatgcaatt  |                       |               |
| atgtaagactgggtccgtg  |                       |               |
| cattgctgtgagcttgg    |                       |               |
| ttcaactgttggagcattg  |                       |               |
| ctctgtgaacgaggtactg  |                       |               |
| tttccagctgatcagttg   |                       |               |
| gatactgttctcggcaaaa  |                       |               |
| gctctctctctgacacac   |                       |               |
| caaatgattgcttccgca   |                       |               |
| ttactgtaccctccatca   |                       |               |
| cgattttgacccaaccgt   |                       |               |
| gttgttctatcttggctc   |                       |               |
| gatggactccatctttt    |                       |               |
| gatcttgatgaagtgcttcc |                       |               |
| cgttgttgagaaaccattg  |                       |               |
| gtgatttagatcagcctt   |                       |               |
| lgtgctgtgtatggaattc  |                       |               |
| cactgtgcttgaattcc    |                       |               |
| gagttgctcatattggc    |                       |               |
| lgtcagttgactcaagactg |                       |               |
| agtccctcagttcactttt  |                       |               |
| atttctatctgcaatggt   |                       |               |
| cttgagcctgaggaagaagt |                       |               |
| agttgctagatgcatatg   |                       |               |
| ltagttgacggtaaggagc  |                       |               |
| gtttgatggagtagctgt   |                       |               |
| lgttccatattgtgtag    |                       |               |
| agcgagtaatttgggggtg  |                       |               |

| 7B. Oligonucleotides used for qRT-PCR |                         |
|---------------------------------------|-------------------------|
| Name                                  | Sequence                |
| SSRP1 fwd                             | TTTGCCAGAAATGTGTGTC     |
| SSRP1 rev                             | AGTCAAAGGCTTGCCATGC     |
| SUPT16H fwd                           | GCAGAAAGGAGCGAAGAGC     |
| SUPT16H rev                           | TTTCCCGAATAIGTGGTTCC    |
| TP53 fwd                              | TCAACAAGATGTTTGCCAACTG  |
| TP53 rev                              | ATGTGCTGTGACTGCTTGTAGA  |
| GAPDH fwd                             | TGCACCACCACTGCTTAGC     |
| GAPDH rev                             | GGCATGGACTGTGGTCATGAG   |
| POU5F1 fwd                            | GAGAACCAGAGTGAAGGCAAC   |
| POU5F1 rev                            | CATAGTCGCTGCTTGTATCGCTT |
| SOX2 fwd                              | GCCGAGTGGAAACTTTTGTCG   |
| SOX2 rev                              | GCAGCGTGACTTATCCTTCTT   |
| KLF4 fwd                              | ACCAGGCACTACCGTAAACAC   |
| KLF4 rev                              | GGTCCGACCTGGAAAATGCT    |
| MYC fwd                               | CGTCTCCACATCAGCACAA     |
| MYC rev                               | CACTGTCCAACCTGACCCTCTT  |

| 7C. List of siRNAs and their sequences |                   |             |                      |
|----------------------------------------|-------------------|-------------|----------------------|
| Targeted gene                          | siRNA pool ID     | siRNA Name  | Sequence             |
| mock                                   | D-001210-01-05    | siGENOME    | UAGCGACUAAAACACAUCAA |
| RLuc                                   | P-002070-01-20    | RLuc Duplex | AAACAUGCAGAAAUGCUG   |
| TP53                                   | MU-003329-03-0002 | D-003329-05 | GAGGUUGGUCUGACUGUA   |
|                                        |                   | D-003329-07 | GCACAGAGGAAGAGAAUCU  |
|                                        |                   | D-003329-08 | GAAGAAACCACUGGAUGGA  |
|                                        |                   | D-003329-26 | GCUUCGAGAUGUCCGAGA   |
| SSRP1                                  | MU-011783-01-0002 | D-011783-01 | GAUGAGAUCCUUUGUCA    |
|                                        |                   | D-011783-03 | GACUUAAACUGCUUACAAA  |
|                                        |                   | D-011783-04 | GCAAGACCUUUGACUACAA  |
|                                        |                   | D-011783-17 | GAGGGAGGAGUACGGGAAA  |
| SUPT16H                                | MU-009517-00-0002 | D-009517-01 | GAAGAUAUGGACGUGUAU   |
|                                        |                   | D-009517-02 | GAACAAAGUCGAAUGUA    |
|                                        |                   | D-009517-03 | AGACAUGGUCUUUGGUA    |
|                                        |                   | D-009517-04 | GAAGAUAUGGUAUGGUA    |

|                      |                      |               |
|----------------------|----------------------|---------------|
| <i>rab-3_set1</i>    | caaagttctgatcggttgt  | Fluor Red 610 |
|                      | atcaggagctfgaacatgta |               |
|                      | tccaactgatgaattccga  |               |
|                      | catcacagtaacggaagg   |               |
|                      | gtngagacgaaggcagaagt |               |
|                      | cacttfgaaatcgattccga |               |
|                      | tttctccaccggaacacag  |               |
|                      | ggtatcccagattfgaatt  |               |
|                      | gatatagggcgtggtgatg  |               |
|                      | cagaatgaatcccatgctc  |               |
|                      | actcttcattagatgctca  |               |
|                      | gcaccaatccgaaacacat  |               |
|                      | tttcccatgagatgcttfg  |               |
|                      | ccaaccaaaacactgggc   |               |
|                      | ttcagagtcatacacatt   |               |
|                      | ccctatccatagatacaact |               |
|                      | aagttgatcagaagtggc   |               |
|                      | ggctgatgttcgaagaatt  |               |
|                      | ctttacatfaatgttccc   |               |
|                      | tctccaccaacttctcaaaa |               |
|                      | tctgccatctatcaaaa    |               |
|                      | ctgtgggtcttaccacac   |               |
|                      | ttcagactctctcttctt   |               |
|                      | aattgcattgcttggagca  |               |
|                      | atfgcttggaaftggga    |               |
|                      | agagctacgcctttagaa   |               |
|                      | cctagatgttgagagggga  |               |
|                      | ttacgatccatatactgg   |               |
|                      | taattaacaaactacccc   |               |
|                      | ggggaatatgattgaacgtt |               |
|                      | gctctgggaattgttgaa   |               |
|                      | ggcactatgattagtaga   |               |
|                      | tgggaactggaaatgacta  |               |
|                      | aatcaactttcagcgggtg  |               |
|                      | cctcgaaaataattctccc  |               |
|                      | taaatccggcatcctcagc  |               |
|                      | ttcaggtctctcagata    |               |
|                      | ccgatctcttcttctaac   |               |
|                      | agatttgacagatcgcctca |               |
|                      | caattccgtccgcaaatgg  |               |
|                      | caatggcttattttgct    |               |
| gatttgaactaattgctgt  |                      |               |
| catattctgattggctct   |                      |               |
| tttgcctttgtgtttg     |                      |               |
| agggctttttcatagttc   |                      |               |
| tctgtgtcctatgtgatt   |                      |               |
| attctctcattctgtgt    |                      |               |
| tctcgaattccagttag    |                      |               |
| ggtttttgttctgatc     |                      |               |
| ggttcaaatgctcagta    |                      |               |
| tcaagttgctcctatcaatc |                      |               |
| cgaattttatgacgccat   |                      |               |
| atggtcagaagacagcgt   |                      |               |
| ccctgtccaaaatgacat   |                      |               |
| tggctgcagaatttcaagt  |                      |               |
| gtaatgaatcaccagcct   |                      |               |
| atgtgcatatttcagaagac |                      |               |
| ttcagcagatgctatcat   |                      |               |
| gaatacggagatgacat    |                      |               |
| gatgatagcagatggcac   |                      |               |
| ggctgattggaatggtga   |                      |               |
| gatctcagcattcgtga    |                      |               |
| gagcaactgagagtttctga |                      |               |
| aaactggcatgattgctct  |                      |               |
| ggttcaatagccattata   |                      |               |
| tctgtaatccagacagttag |                      |               |
| gtcattgggcaagatgat   |                      |               |
| tctgctgtcaatgattc    |                      |               |
| atgacagatgtgacctg    |                      |               |
| tgtgagctacatacct     |                      |               |
| tccatcaataatccct     |                      |               |
| catgtagttggcatgctat  |                      |               |
| aaactttcttctcctt     |                      |               |
| cctcagatctgcaaaaccg  |                      |               |
| gtgagccatctgaagacaa  |                      |               |
| cttgctcagaaaggaggga  |                      |               |
| gcaacttctcagatgagc   |                      |               |
| aaagcaactgacaccgacaa |                      |               |
| ctttacatagggagctgga  |                      |               |
| tttggcaatgattttgct   |                      |               |
| ttccatagaccgtaaac    |                      |               |
| tttgcgaatccccatgat   |                      |               |
| cagttataccacctatta   |                      |               |
| cgatcattttgtttgtc    |                      |               |
| catctgagacggaggttg   |                      |               |
| gttatagcctgttcggttac |                      |               |

|                      |                      |               |
|----------------------|----------------------|---------------|
| <i>unc-10_set1</i>   | taaatccggcatcctcagc  | Fluor Red 610 |
|                      | ttcaggtctctcagata    |               |
|                      | ccgatctcttcttctaac   |               |
|                      | agatttgacagatcgcctca |               |
|                      | caattccgtccgcaaatgg  |               |
|                      | caatggcttattttgct    |               |
|                      | gatttgaactaattgctgt  |               |
|                      | catattctgattggctct   |               |
|                      | tttgcctttgtgtttg     |               |
|                      | agggctttttcatagttc   |               |
|                      | tctgtgtcctatgtgatt   |               |
|                      | attctctcattctgtgt    |               |
|                      | tctcgaattccagttag    |               |
|                      | ggtttttgttctgatc     |               |
|                      | ggttcaaatgctcagta    |               |
|                      | tcaagttgctcctatcaatc |               |
|                      | cgaattttatgacgccat   |               |
|                      | atggtcagaagacagcgt   |               |
|                      | ccctgtccaaaatgacat   |               |
|                      | tggctgcagaatttcaagt  |               |
|                      | gtaatgaatcaccagcct   |               |
|                      | atgtgcatatttcagaagac |               |
|                      | ttcagcagatgctatcat   |               |
|                      | gaatacggagatgacat    |               |
|                      | gatgatagcagatggcac   |               |
|                      | ggctgattggaatggtga   |               |
|                      | gatctcagcattcgtga    |               |
|                      | gagcaactgagagtttctga |               |
|                      | aaactggcatgattgctct  |               |
|                      | ggttcaatagccattata   |               |
|                      | tctgtaatccagacagttag |               |
|                      | gtcattgggcaagatgat   |               |
|                      | tctgctgtcaatgattc    |               |
|                      | atgacagatgtgacctg    |               |
|                      | tgtgagctacatacct     |               |
|                      | tccatcaataatccct     |               |
|                      | catgtagttggcatgctat  |               |
|                      | aaactttcttctcctt     |               |
|                      | cctcagatctgcaaaaccg  |               |
|                      | gtgagccatctgaagacaa  |               |
|                      | cttgctcagaaaggaggga  |               |
| gcaacttctcagatgagc   |                      |               |
| aaagcaactgacaccgacaa |                      |               |
| ctttacatagggagctgga  |                      |               |
| tttggcaatgattttgct   |                      |               |
| ttccatagaccgtaaac    |                      |               |
| tttgcgaatccccatgat   |                      |               |
| cagttataccacctatta   |                      |               |
| cgatcattttgtttgtc    |                      |               |
| catctgagacggaggttg   |                      |               |
| gttatagcctgttcggttac |                      |               |



|                     |                      |               |
|---------------------|----------------------|---------------|
| <i>unc-119_set1</i> | lgattttcgcgagaagcic  | Fluor Red 610 |
|                     | agagctagcacatcattgg  |               |
|                     | gcataggaatcctgagtga  |               |
|                     | ttatagacgfttgcgatgg  |               |
|                     | cgagtcacggattggaat   |               |
|                     | gcaattcgaagacacggtg  |               |
|                     | attctctccgtctcatttt  |               |
|                     | gatatcggacatcttggc   |               |
|                     | aatgtgtgatcggcacatcg |               |
|                     | aagtgccgttcaatcattcg |               |
|                     | gcatttcaataaacgatcct |               |
|                     | ggcatacagaatccaaattc |               |
|                     | lgttcacagttgttctega  |               |
|                     | gttgtgtgaaaattgtgga  |               |
|                     | attattgatactgtctcca  |               |
|                     | aatagaagctatcggagcgg |               |
|                     | gtgcattacgagctattct  |               |
|                     | tgcatcacagatgctcgg   |               |

## **Supplemental Tables:**

**Table S1.** Whole-Genome RNAi screening results, Related to Figure 1  
(provided as Excel file)

**Table S2.** Results of HMG-3 and HMG-4 Co-Immunoprecipitation with subsequent Mass Spectrometry analysis, Related to Figure S2 and Mass Spectrometry Analysis as described in Star Methods  
(provided as Excel file)

**Table S3.** ChIP-seq, ATAC-seq and RNA-seq analysis of *hmg-3*, *hmg-4*, and *spt-16* , Related to Figures 4, S3 and S4  
(provided as Excel file)

**Table S4:** ChIP-seq for SSRP1 and SUPT16H with RNA-seq analysis of SSRP1 and SUPT16H knockdown, Related to Figures 6 and S6  
(provided as Excel file)

**Table S5.** ATAC-seq analysis of SSRP1 and SUPT16H knockdown, Related to Figures 6 and S6  
(provided as Excel file)

**Table S6.** Summary of FACT depletion effects based on RNA-seq and ATAC-seq in *C. elegans* and Human Cells, Related to Figures 4, S3, S4, 6, and S6

**Table S7.** *C. elegans* strains used in the study, Related to STAR Methods

**Table S8.** Sequences of smFISH Oligos, PCR primers, and siRNAs, Related to Star Methods
